# Supplementary material
Source: bioRxiv or medRxiv preprint supplement (https://www.biorxiv.org/highwire/filestream/130491/field_highwire_adjunct_files/10/434654-8.pdf)
Supplement: Supplementary file [file 434654-8.pdf]

1 **Table S7.** Effects of warming and precipitation treatments (fixed effects) on (log  
2 transformed) Gram-positive:Gram-negative ratios in the summer and the fall, using a mixed-  
3 effects model that included the fixed effect of time and the random effect of blocks. P values  
4 for Type III sum of squares with a Satterthwaite approximation for the degrees of freedom.  
5 Significance codes: P < 0.001 '\*\*\*'.

6

|                      | <b>Sum. Sq.</b> | <b>Mean Sq.</b> | <b>num df</b> | <b>den df</b> | <b>F</b> | <b>P</b>   |
|----------------------|-----------------|-----------------|---------------|---------------|----------|------------|
| <b>Precip</b>        | 0.032           | 0.016           | 2             | 69            | 1.533    | 0.223      |
| <b>Temp</b>          | 0.019           | 0.006           | 3             | 69            | 0.611    | 0.610      |
| <b>Season</b>        | 0.192           | 0.192           | 1             | 69            | 18.516   | < 0.001*** |
| <b>Precip:Temp</b>   | 0.089           | 0.015           | 6             | 69            | 1.433    | 0.215      |
| <b>Precip:Season</b> | 0.003           | 0.002           | 2             | 69            | 0.150    | 0.861      |
| <b>Temp:Season</b>   | 0.029           | 0.010           | 3             | 69            | 0.936    | 0.428      |

7
